# Supplementary material
Source: PubMed Central journal article supplement (PMC7040851)
Supplement: NIHMS1559315-supplement-Appendix.pdf [file NIHMS1559315-supplement-Appendix.pdf]

**Appendix A: Weighted and Unweighted Socio-Demographic Characteristics of the 2019 Study Sample and National Rates (N=1,680)**

|                                 | Unweighted | Weighted | National Comparison |
|---------------------------------|------------|----------|---------------------|
| Female (%)                      | 48.0       | 51.6     | 48.4                |
| Age (%)                         |            |          |                     |
| 18-29                           | 15.1       | 21.1     | 21.1                |
| 30-44                           | 28.5       | 24.5     | 25.0                |
| 45-59                           | 53.5       | 25.9     | 25.3                |
| 60+                             | 32.9       | 28.6     | 28.6                |
| Race/Ethnicity (%)              |            |          |                     |
| White only                      | 66.4       | 63.5     | 60.5                |
| Black only                      | 10.2       | 11.9     | 12.3                |
| Other                           | 8.0        | 8.4      | 8.9                 |
| Hispanic                        | 15.2       | 16.2     | 18.3                |
| Education (%)                   |            |          |                     |
| < High school                   | 3.9        | 10.5     | 10.9                |
| High school                     | 16.9       | 29.1     | 28.6                |
| Some college                    | 43.0       | 28.2     | 28.2                |
| Bachelor's degree or higher     | 36.2       | 32.3     | 32.3                |
| Household income (%)            |            |          |                     |
| Under \$10,000                  | 4.4        | 6.0      | 6.4                 |
| \$10,000-\$24,999               | 11.8       | 13.0     | 11.5                |
| \$25,000-\$49,999               | 24.8       | 25.3     | 20.5                |
| \$50,000-\$74,999               | 20.6       | 20.1     | 16.0                |
| \$75,000 or higher              | 38.5       | 35.7     | 45.6                |
| Employment status (%)           |            |          |                     |
| Employed                        | 62.0       | 60.7     | 61.5                |
| Unemployed                      | 4.8        | 6.9      | 2.6                 |
| Other                           | 33.3       | 32.5     | 35.9                |
| Region (%)                      |            |          |                     |
| Northeast                       | 14.8       | 17.8     | 17.3                |
| Midwest                         | 26.3       | 20.8     | 20.9                |
| South                           | 34.9       | 37.7     | 37.9                |
| West                            | 24.1       | 23.8     | 23.9                |
| Political Party Affiliation (%) |            |          |                     |
| Republican                      | 29.7       | 27.5     | 29.5                |
| Independent                     | 38.7       | 41.0     | 33.8                |
| Democrat                        | 31.6       | 31.5     | 36.7                |

National comparison data were obtained from the Current Population Survey (CPS):

<https://www.census.gov/cps/data/cpstablescreator.html> and from the American National Election Studies (ANES):

[https://www.electionstudies.org/studypages/anes\\_timeseries\\_2016/anes\\_timeseries\\_2016.htm](https://www.electionstudies.org/studypages/anes_timeseries_2016/anes_timeseries_2016.htm)

Data from the 2019 National Survey of Gun Policy conducted by the Johns Hopkins Center for Gun Policy and Research

Full paper available: Barry CL, Stone EM, Crifasi, CK, et al. (2019). Trends in public opinion on US gun laws: Majorities of gun owners and non-gun owners support a range of measures. *Health Affairs*, 38(10), 1-8.

<https://doi.org/10.1377/hlthaff.2019.00576>

**Appendix B. Comparing Public Support for 18 Different Gun Policies from 2015 to 2019**

| <b>Policy</b>                                                                                                                                                                                                                                   | <b>2015</b> | <b>2019</b> |
|-------------------------------------------------------------------------------------------------------------------------------------------------------------------------------------------------------------------------------------------------|-------------|-------------|
|                                                                                                                                                                                                                                                 | (N=1,326)   | (N=1,680)   |
| <b>License and background check policies</b>                                                                                                                                                                                                    |             |             |
| Requiring a person to obtain a license from a local law enforcement agency before buying a gun to verify their identity and ensure that they are not legally prohibited from having a gun                                                       | 72%         | 77%*        |
| Requiring a background check system for all gun sales to make sure a purchaser is not legally prohibited from having a gun                                                                                                                      | 84%         | 88%*        |
| Requiring states to report a person to the background check system who is prohibited from buying a gun due either to involuntary commitment to a hospital for psychiatric treatment or to being declared mentally incompetent by a court of law | 82%         | 85%         |
| <b>Prohibited person policies</b>                                                                                                                                                                                                               |             |             |
| Prohibiting a person convicted of a serious crime as a juvenile from having a gun for 10 years                                                                                                                                                  | 73%         | 74%         |
| Prohibiting a person under the age of 21 from having a handgun                                                                                                                                                                                  | 66%         | 65%         |
| Prohibiting a person subject to a temporary domestic violence restraining order from having a gun for the duration of the order                                                                                                                 | 79%         | 81%         |
| Prohibiting a person convicted of two or more DWI or DUIs in a five-year period from having a gun for five years                                                                                                                                | 50%         | 59%***      |
| Prohibiting a person convicted of two or more misdemeanor crimes involving illegal drugs in a five-year period from having a gun for five years                                                                                                 | 64%         | 66%         |
| <b>Assault weapon and ammunition policies</b>                                                                                                                                                                                                   |             |             |
| Banning the sale of military-style, semi-automatic assault weapons that are capable of shooting more than 10 rounds of ammunition without reloading                                                                                             | 63%         | 64%         |
| Banning the sale of large-capacity ammunition clips or magazines that allow some guns to shoot more than 10 bullets before reloading                                                                                                            | 60%         | 61%         |
| <b>Policies affecting gun dealers</b>                                                                                                                                                                                                           |             |             |
| Allowing cities to sue licensed gun dealers when there is strong evidence that the gun dealer's careless sales practices allowed many criminals to obtain guns                                                                                  | 72%         | 73%         |
| Allowing the Bureau of Alcohol, Tobacco and Firearms to temporarily take away a gun dealer's license if an audit reveals record-keeping violations and the dealer cannot account for 20 or more of his guns                                     | 79%         | 83%         |
| Allowing the information about which gun dealers sell the most guns used in crimes to be available to the police and the public so that those gun dealers can be prioritized for greater oversight                                              | 67%         | 73%**       |
| <b>Temporary firearm removal policies</b>                                                                                                                                                                                                       |             |             |
| Authorizing law enforcement officers to temporarily remove guns from individuals who the officer determines pose an immediate threat of harm to self or others                                                                                  | 71%         | 76%*        |
| Allowing family members to ask the court to temporarily remove guns from a relative who they believe is at risk of harm to self or others                                                                                                       | 72%         | 80%***      |

| Other policies                                                                                                                                                                |     |       |
|-------------------------------------------------------------------------------------------------------------------------------------------------------------------------------|-----|-------|
| Requiring a mandatory minimum sentence of two years in prison for a person convicted of knowingly selling a gun to someone who cannot legally have a gun                      | 71% | 77%** |
| Requiring by law that a person lock up the guns in their home when not in use to prevent handling by children or teenagers without adult supervision                          | 69% | 74%*  |
| Allowing people who have lost the right to have a gun due to involuntary commitment for mental illness to have that right restored if they are determined not to be dangerous | 39% | 41%   |

\*p≤0.05, \*\*p≤0.01, \*\*\* p≤0.001

Data from the 2015 and 2019 National Survey of Gun Policy conducted by the Johns Hopkins Center for Gun Policy and Research

Full paper available: Barry CL, Stone EM, Crifasi, CK, et al. (2019). Trends in public opinion on US gun laws: Majorities of gun owners and non-gun owners support a range of measures. *Health Affairs*, 38(10), 1-8. <https://doi.org/10.1377/hlthaff.2019.00576>

**Appendix C. Comparing Public Support for 18 Different Gun Policies among Gun Owners and Non-Gun Owners and by Political Party Identification in 2019 (N=1,680)**

| <b>Policy</b>                                                                                                                                                                                                                                   | <b>Overall</b><br>(N=1,680) | <b>Non-Gun owners</b><br>(N=1,070) | <b>Gun owners</b><br>(N=610) |
|-------------------------------------------------------------------------------------------------------------------------------------------------------------------------------------------------------------------------------------------------|-----------------------------|------------------------------------|------------------------------|
| <b>License and background check policies</b>                                                                                                                                                                                                    |                             |                                    |                              |
| Requiring a person to obtain a license from a local law enforcement agency before buying a gun to verify their identity and ensure that they are not legally prohibited from having a gun                                                       | 77%                         | 82%                                | 63%***                       |
| Requiring a background check system for all gun sales to make sure a purchaser is not legally prohibited from having a gun                                                                                                                      | 88%                         | 88%                                | 85%                          |
| Requiring states to report a person to the background check system who is prohibited from buying a gun due either to involuntary commitment to a hospital for psychiatric treatment or to being declared mentally incompetent by a court of law | 85%                         | 86%                                | 84%                          |
| <b>Prohibited person policies</b>                                                                                                                                                                                                               |                             |                                    |                              |
| Prohibiting a person convicted of a serious crime as a juvenile from having a gun for 10 years                                                                                                                                                  | 74%                         | 75%                                | 71%                          |
| Prohibiting a person under the age of 21 from having a handgun                                                                                                                                                                                  | 65%                         | 69%                                | 55%***                       |
| Prohibiting a person subject to a temporary domestic violence restraining order from having a gun for the duration of the order                                                                                                                 | 81%                         | 83%                                | 74%**                        |
| Prohibiting a person convicted of two or more DWI or DUIs in a five-year period from having a gun for five years                                                                                                                                | 59%                         | 62%                                | 51%***                       |
| Prohibiting a person convicted of two or more misdemeanor crimes involving illegal drugs in a five-year period from having a gun for five years                                                                                                 | 66%                         | 67%                                | 63%                          |
| <b>Assault weapon and ammunition policies</b>                                                                                                                                                                                                   |                             |                                    |                              |
| Banning the sale of military-style, semi-automatic assault weapons that are capable of shooting more than 10 rounds of ammunition without reloading                                                                                             | 64%                         | 72%                                | 42%***                       |
| Banning the sale of large-capacity ammunition clips or magazines that allow some guns to shoot more than 10 bullets before reloading                                                                                                            | 61%                         | 70%                                | 38%***                       |
| <b>Policies affecting gun dealers</b>                                                                                                                                                                                                           |                             |                                    |                              |
| Allowing cities to sue licensed gun dealers when there is strong evidence that the gun dealer's careless sales practices allowed many criminals to obtain guns                                                                                  | 73%                         | 76%                                | 66%***                       |
| Allowing the Bureau of Alcohol, Tobacco and Firearms to temporarily take away a gun dealer's license if an audit reveals record-keeping violations and the dealer cannot account for 20 or more of his guns                                     | 83%                         | 84%                                | 80%                          |
| Allowing the information about which gun dealers sell the most guns used in crimes to be available to the police and the public so that those gun dealers can be prioritized for greater oversight                                              | 73%                         | 78%                                | 60%***                       |
| <b>Temporary firearm removal policies</b>                                                                                                                                                                                                       |                             |                                    |                              |
| Authorizing law enforcement officers to temporarily remove guns from individuals who the officer determines pose an immediate threat of harm to self or others                                                                                  | 76%                         | 80%                                | 66%***                       |

|                                                                                                                                                                               |     |     |        |
|-------------------------------------------------------------------------------------------------------------------------------------------------------------------------------|-----|-----|--------|
| Allowing family members to ask the court to temporarily remove guns from a relative who they believe is at risk of harm to self or others                                     | 80% | 82% | 72%*** |
| <b>Other policies</b>                                                                                                                                                         |     |     |        |
| Requiring a mandatory minimum sentence of two years in prison for a person convicted of knowingly selling a gun to someone who cannot legally have a gun                      | 77% | 79% | 70%**  |
| Requiring by law that a person lock up the guns in their home when not in use to prevent handling by children or teenagers without adult supervision                          | 74% | 79% | 60%*** |
| Allowing people who have lost the right to have a gun due to involuntary commitment for mental illness to have that right restored if they are determined not to be dangerous | 41% | 40% | 44%    |

\*p≤0.05, \*\*p≤0.01, \*\*\* p≤0.001

P-values indicate difference between gun owners relative to non-gun owners.

| Policy                                                                                                                                                                                                                                          | Overall<br>(N=1,680) | Democrat<br>(N=531) | Independent<br>(N=650) | Republican<br>(N=499) |
|-------------------------------------------------------------------------------------------------------------------------------------------------------------------------------------------------------------------------------------------------|----------------------|---------------------|------------------------|-----------------------|
| <b>License and background check policies</b>                                                                                                                                                                                                    |                      |                     |                        |                       |
| Requiring a person to obtain a license from a local law enforcement agency before buying a gun to verify their identity and ensure that they are not legally prohibited from having a gun                                                       | 77%                  | 88%                 | 73%***                 | 70%***                |
| Requiring a background check system for all gun sales to make sure a purchaser is not legally prohibited from having a gun                                                                                                                      | 88%                  | 92%                 | 84%**                  | 88%                   |
| Requiring states to report a person to the background check system who is prohibited from buying a gun due either to involuntary commitment to a hospital for psychiatric treatment or to being declared mentally incompetent by a court of law | 85%                  | 88%                 | 83%                    | 86%                   |
| <b>Prohibited person policies</b>                                                                                                                                                                                                               |                      |                     |                        |                       |
| Prohibiting a person convicted of a serious crime as a juvenile from having a gun for 10 years                                                                                                                                                  | 74%                  | 80%                 | 71%*                   | 73%                   |
| Prohibiting a person under the age of 21 from having a handgun                                                                                                                                                                                  | 65%                  | 81%                 | 57%***                 | 60%***                |
| Prohibiting a person subject to a temporary domestic violence restraining order from having a gun for the duration of the order                                                                                                                 | 81%                  | 87%                 | 76%***                 | 81%                   |
| Prohibiting a person convicted of two or more DWI or DUIs in a five-year period from having a gun for five years                                                                                                                                | 59%                  | 69%                 | 55%***                 | 53%***                |
| Prohibiting a person convicted of two or more misdemeanor crimes involving illegal drugs in a five-year period from having a gun for five years                                                                                                 | 66%                  | 68%                 | 60%*                   | 73%                   |
| <b>Assault weapon and ammunition policies</b>                                                                                                                                                                                                   |                      |                     |                        |                       |
| Banning the sale of military-style, semi-automatic assault weapons that are capable of shooting more than 10 rounds of ammunition without reloading                                                                                             | 64%                  | 82%                 | 61%***                 | 49%***                |
| Banning the sale of large-capacity ammunition clips or magazines that allow some                                                                                                                                                                | 61%                  | 79%                 | 54%***                 | 51%***                |

|                                                                                                                                                                                                             |     |     |        |        |
|-------------------------------------------------------------------------------------------------------------------------------------------------------------------------------------------------------------|-----|-----|--------|--------|
| guns to shoot more than 10 bullets before reloading                                                                                                                                                         |     |     |        |        |
| <b>Policies affecting gun dealers</b>                                                                                                                                                                       |     |     |        |        |
| Allowing cities to sue licensed gun dealers when there is strong evidence that the gun dealer's careless sales practices allowed many criminals to obtain guns                                              | 73% | 79% | 70%*   | 71%    |
| Allowing the Bureau of Alcohol, Tobacco and Firearms to temporarily take away a gun dealer's license if an audit reveals record-keeping violations and the dealer cannot account for 20 or more of his guns | 83% | 86% | 78%    | 86%    |
| Allowing the information about which gun dealers sell the most guns used in crimes to be available to the police and the public so that those gun dealers can be prioritized for greater oversight          | 73% | 82% | 69%*** | 70%*** |
| <b>Temporary firearm removal policies</b>                                                                                                                                                                   |     |     |        |        |
| Authorizing law enforcement officers to temporarily remove guns from individuals who the officer determines pose an immediate threat of harm to self or others                                              | 76% | 84% | 69%*** | 76%*   |
| Allowing family members to ask the court to temporarily remove guns from a relative who they believe is at risk of harm to self or others                                                                   | 80% | 88% | 75%*** | 76%*** |
| <b>Other policies</b>                                                                                                                                                                                       |     |     |        |        |
| Requiring a mandatory minimum sentence of two years in prison for a person convicted of knowingly selling a gun to someone who cannot legally have a gun                                                    | 77% | 82% | 72%**  | 79%    |
| Requiring by law that a person lock up the guns in their home when not in use to prevent handling by children or teenagers without adult supervision                                                        | 74% | 85% | 68%*** | 68%*** |
| Allowing people who have lost the right to have a gun due to involuntary commitment for mental illness to have that right restored if they are determined not to be dangerous                               | 41% | 38% | 42%    | 44%    |

\*p≤0.05, \*\*p≤0.01, \*\*\* p≤0.001

P-values indicate differences between Independents relative to Democrats and Republicans relative to Democrats.

Data from the 2019 National Survey of Gun Policy conducted by the Johns Hopkins Center for Gun Policy and Research

Full paper available: Barry CL, Stone EM, Crifasi, CK, et al. (2019). Trends in public opinion on US gun laws: Majorities of gun owners and non-gun owners support a range of measures. *Health Affairs*, 38(10), 1-8. <https://doi.org/10.1377/hlthaff.2019.00576>

**Appendix D. Comparing Public Support for Concealed Carry Policies among Gun Owners and Non-Gun Owners and by Political Party Identification in 2019 (N=1,680)**

| <b>Policy</b>                                                                                                                                                                                             | <b>Overall</b><br>(N=1,680) | <b>Non-Gun owner</b><br>(N=1,070) | <b>Gun owner</b><br>(N=610) |
|-----------------------------------------------------------------------------------------------------------------------------------------------------------------------------------------------------------|-----------------------------|-----------------------------------|-----------------------------|
| Requiring a person who has applied for a license to carry a concealed gun in public to pass a test demonstrating that they can safely and lawfully handle a gun in common situations they might encounter | 81%                         | 83%                               | 73%***                      |
| Requiring a state to recognize a concealed carry permit from another state, even if that other state's firearm concealed carry permitting standards are lower                                             | 49%                         | 43%                               | 64%***                      |
| Allowing a person who can legally carry a concealed gun to bring that gun onto a college or university campus                                                                                             | 36%                         | 29%                               | 55%***                      |
| Allowing a person who can legally carry a concealed gun to bring that gun onto school grounds for kindergarten through 12th grade                                                                         | 31%                         | 25%                               | 47%***                      |
| Allowing a person who can legally own a gun to carry a loaded, concealed handgun in public without having to obtain a concealed carry license                                                             | 22%                         | 18%                               | 34%***                      |

\*p≤0.05, \*\*p≤0.01, \*\*\* p≤0.001

P-values indicate difference between gun owners relative to non-gun owners.

| <b>Policy</b>                                                                                                                                                                                             | <b>Overall</b><br>(N=1,680) | <b>Democrat</b><br>(N=531) | <b>Independent</b><br>(N=650) | <b>Republican</b><br>(N=499) |
|-----------------------------------------------------------------------------------------------------------------------------------------------------------------------------------------------------------|-----------------------------|----------------------------|-------------------------------|------------------------------|
| Requiring a person who has applied for a license to carry a concealed gun in public to pass a test demonstrating that they can safely and lawfully handle a gun in common situations they might encounter | 81%                         | 89%                        | 76%***                        | 79%**                        |
| Requiring a state to recognize a concealed carry permit from another state, even if that other state's firearm concealed carry permitting standards are lower                                             | 49%                         | 37%                        | 47%*                          | 65%***                       |
| Allowing a person who can legally carry a concealed gun to bring that gun onto a college or university campus                                                                                             | 36%                         | 18%                        | 35%***                        | 57%***                       |
| Allowing a person who can legally carry a concealed gun to bring that gun onto school grounds for kindergarten through 12th grade                                                                         | 31%                         | 14%                        | 32%***                        | 48%***                       |
| Allowing a person who can legally own a gun to carry a loaded, concealed handgun in public without having to obtain a concealed carry license                                                             | 22%                         | 14%                        | 24%**                         | 29%***                       |

\*p≤0.05, \*\*p≤0.01, \*\*\* p≤0.001

P-values indicate differences between Independents relative to Democrats and Republicans relative to Democrats.

Data from the 2019 National Survey of Gun Policy conducted by the Johns Hopkins Center for Gun Policy and Research

Full paper available: Barry CL, Stone EM, Crifasi, CK, et al. (2019). Trends in public opinion on US gun laws: Majorities of gun owners and non-gun owners support a range of measures. *Health Affairs*, 38(10), 1-8. <https://doi.org/10.1377/hlthaff.2019.00576>

**Appendix E. Comparing Public Support for Safety Training for First Time Gun Owners, Gun Prohibitions for People with Violent Crime Convictions, Untraceable Gun Prohibitions, Age Requirements for Semi-automatic Rifles, and Stand Your Ground Policies among Gun Owners and Non-Gun Owners and by Political Party Identification in 2019 (N=1,680)**

| Policy                                                                                                                                                                     | Overall<br>(N=1,680) | Non-Gun owner<br>(N=1,070) | Gun owner<br>(N=610) |
|----------------------------------------------------------------------------------------------------------------------------------------------------------------------------|----------------------|----------------------------|----------------------|
| Requiring first-time gun purchasers to take a safety course on safe handling and storage before buying a gun                                                               | 84%                  | 87%                        | 74%***               |
| Prohibiting a person convicted of a violent crime for which the maximum penalty is one year from carrying a gun in public for 10 years                                     | 78%                  | 80%                        | 73%*                 |
| Prohibiting a person from making or possessing a gun without a serial number, such a 3D-printed gun, making the gun untraceable                                            | 75%                  | 77%                        | 69%**                |
| Requiring an owner of a semi-automatic rifle to be at least 21 years of age                                                                                                | 73%                  | 77%                        | 61%***               |
| Allowing a person with a gun who feels a threat of serious injury from another person to shoot or kill that threatening person, even if the gun owner could safely retreat | 31%                  | 28%                        | 40%***               |

\*p≤0.05, \*\*p≤0.01, \*\*\* p≤0.001

P-values indicate difference between gun owners relative to non-gun owners.

| Policy                                                                                                                                                                     | Overall<br>(N=1,680) | Democrat<br>(N=531) | Independent<br>(N=650) | Republican<br>(N=499) |
|----------------------------------------------------------------------------------------------------------------------------------------------------------------------------|----------------------|---------------------|------------------------|-----------------------|
| Requiring first-time gun purchasers to take a safety course on safe handling and storage before buying a gun                                                               | 84%                  | 92%                 | 80%***                 | 80%***                |
| Prohibiting a person convicted of a violent crime for which the maximum penalty is one year from carrying a gun in public for 10 years                                     | 78%                  | 81%                 | 73%*                   | 82%                   |
| Prohibiting a person from making or possessing a gun without a serial number, such a 3D-printed gun, making the gun untraceable                                            | 75%                  | 82%                 | 68%***                 | 78%                   |
| Requiring an owner of a semi-automatic rifle to be at least 21 years of age                                                                                                | 73%                  | 84%                 | 67%***                 | 70%***                |
| Allowing a person with a gun who feels a threat of serious injury from another person to shoot or kill that threatening person, even if the gun owner could safely retreat | 31%                  | 20%                 | 33%***                 | 42%***                |

\*p≤0.05, \*\*p≤0.01, \*\*\* p≤0.001

P-values indicate differences between Independents relative to Democrats and Republicans relative to Democrats.

Data from the 2019 National Survey of Gun Policy conducted by the Johns Hopkins Center for Gun Policy and Research

Full paper available: Barry CL, Stone EM, Crifasi, CK, et al. (2019). Trends in public opinion on US gun laws: Majorities of gun owners and non-gun owners support a range of measures. *Health Affairs*, 38(10), 1-8. <https://doi.org/10.1377/hlthaff.2019.00576>

## Appendix F. Examining Geographic Variation by State in Public Support for Four Gun Policies Pooling Four Waves of Survey Data, 2013-2019

1. Assault weapon ban



2. Universal background check policy



3. Purchaser licensing policy



4. Safe gun storage policy



□ Insufficient data\*   □ 0-24% support   □ 25-49% support   □ 50-74% support   □ 75-100% support

\*States with insufficient data had <50 respondents across all four survey waves. Includes AK, DE, HI, ME, MS, MT, ND, NH, RI, VT and WY.

Data from the 2013, 2015, 2017, and 2019 National Survey of Gun Policy conducted by the Johns Hopkins Center for Gun Policy and Research

Full paper available: Barry CL, Stone EM, Crifasi, CK, et al. (2019). Trends in public opinion on US gun laws: Majorities of gun owners and non-gun owners support a range of measures. *Health Affairs*, 38(10), 1-8. <https://doi.org/10.1377/hlthaff.2019.00576>
